# Supplementary material for: GluA1 Phosphorylation Alters Evoked Firing PatternIn Vivo
Source: Hindawi journal article supplement (doi:10.1155/2012/286215), 2012-01-01
Supplement: f1 [file 286215.f1.pdf]

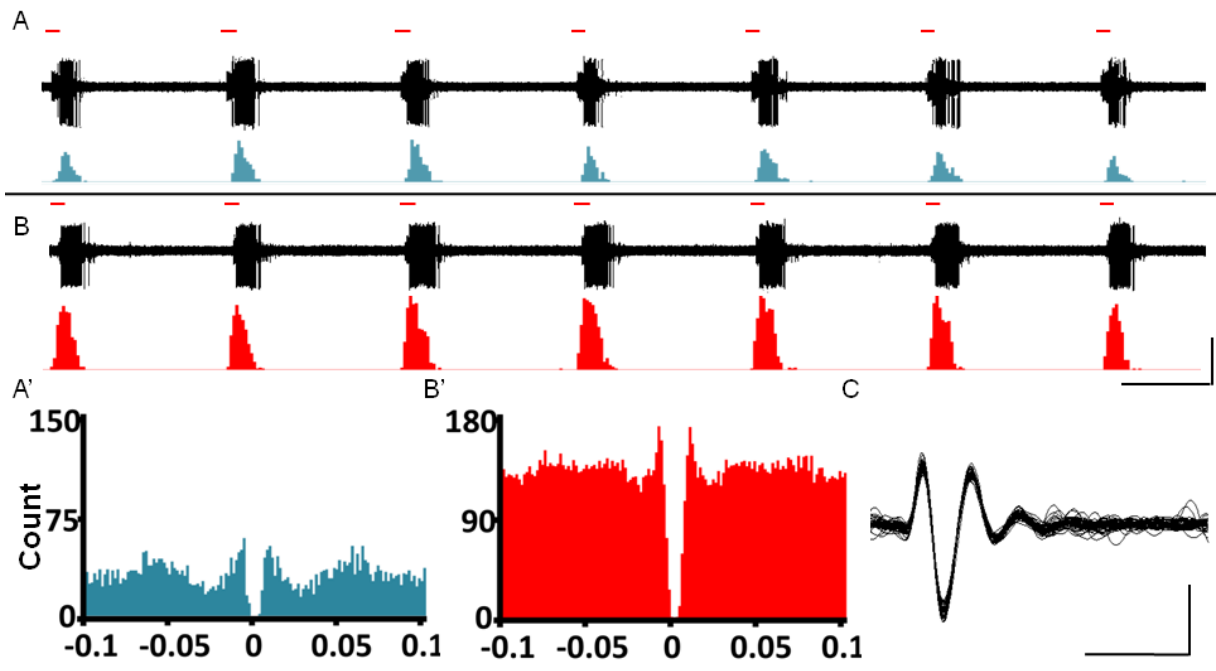

Supplementary Figure 1.

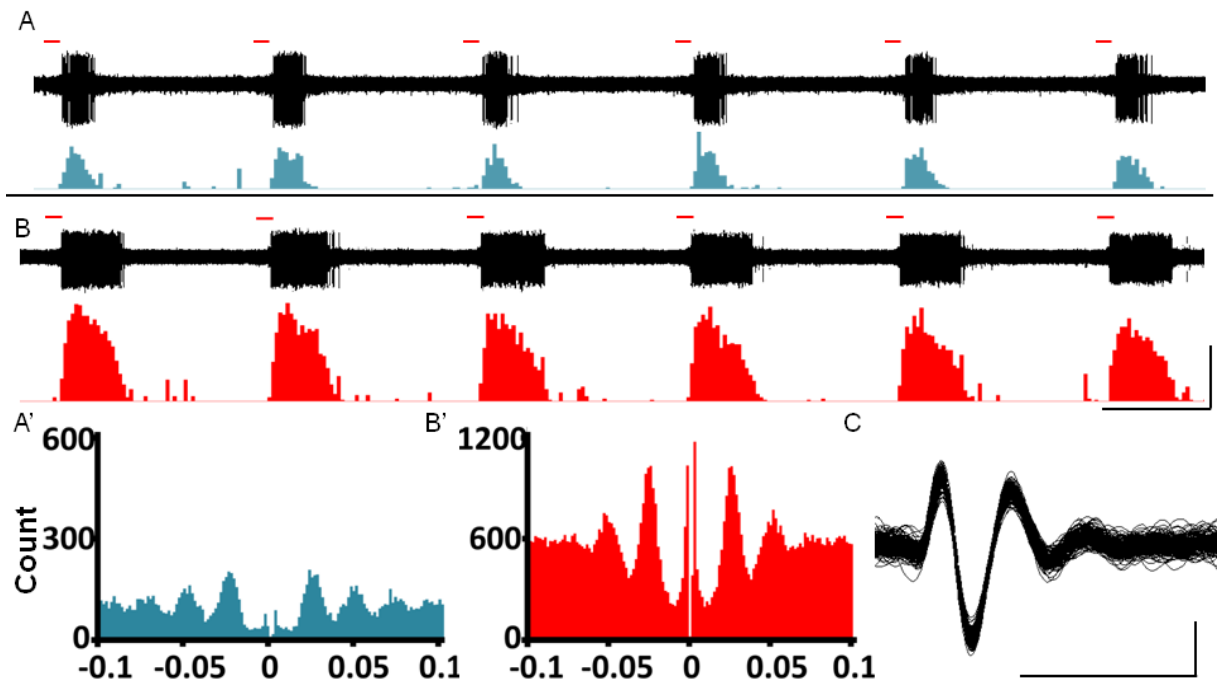

Supplementary Figure 2.

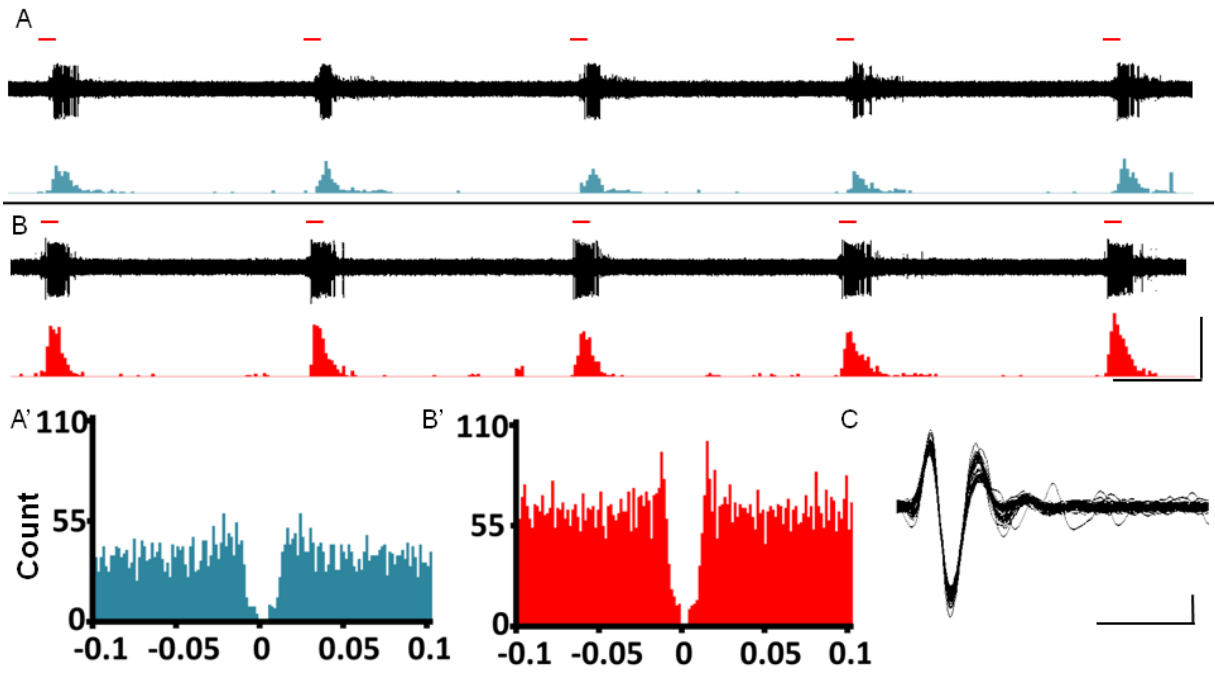

Supplementary Figure 3.
